# Supplementary material for: Atomic layer deposition of Y2O3 films using a novel liquid homoleptic yttrium precursor tris(sec-butylcyclopentadienyl)yttrium [Y(sBuCp)3] and water
Source: Royal Society of Chemistry journal article supplement (doi:10.1039/d3ra05217f), 2023-01-01
Supplement: d3ra05217f1.pdf [file d3ra05217f1.pdf]

## Supporting Information

# Atomic Layer Deposition of Y<sub>2</sub>O<sub>3</sub> Films Using Novel Liquid Homoleptic Yttrium Precursor Tris(sec- butylcyclopentadienyl)yttrium [Y(<sup>s</sup>BuCp)<sub>3</sub>] and Water

*Akihiro Nishida,<sup>\*,†,‡</sup> Tsukasa Katayama,<sup>§,††</sup> and Yasutaka Matsuo<sup>\*,§</sup>*

<sup>†</sup> Graduate School of Chemical Sciences and Engineering, Hokkaido University, N13W8, Kita-ku, Sapporo 060-8628, Japan.

<sup>‡</sup> Semiconductor Materials Department, Electronic Materials Development Laboratory, ADEKA CORPORATION, 7-2-34 Higashiogu, Arakawa-ku, Tokyo 116-8553, Japan

<sup>§</sup> Research Institute for Electronic Science (RIES), Hokkaido University, N21W10, Sapporo 001-0021, Japan.

<sup>††</sup> JST-PRESTO, Kawaguchi, Saitama 332-0012, Japan.

\*Corresponding authors; E-mails: nishida.akihiro.y9@elms.hokudai.ac.jp;  
a.nishida@adeka.co.jp

## Supplementary Figures

### Long-term thermal stability data of $Y(^sBuCp)_3$ precursor

Figure S1 shows TGA curves recorded during the long-term thermal stability test. The  $Y(^sBuCp)_3$  was heated at 190 °C, which is the temperature at which it vaporizes at 1 Torr, and periodically characterized by TGA and  $^1H$ -NMR. The results show very clean TG curves before and after the sample was heated at 190 °C for 18 weeks.

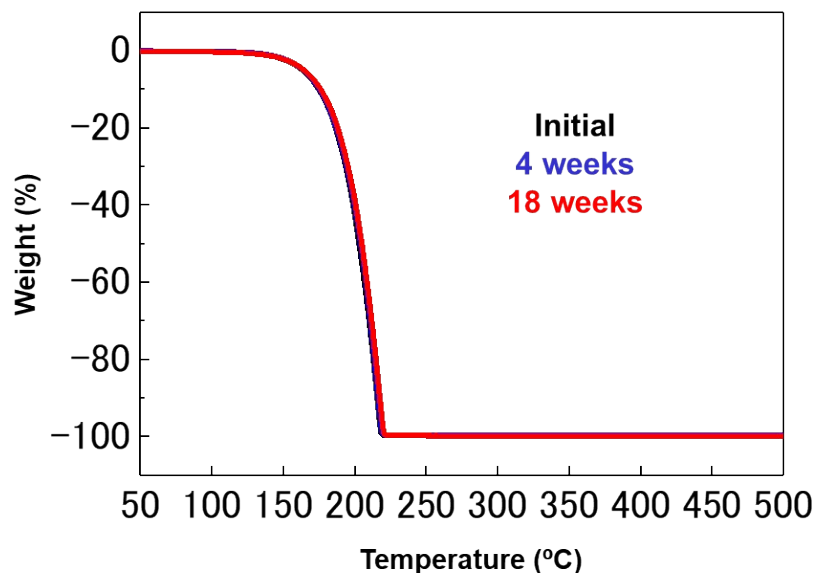

Fig. S1 TGA curves recorded during long-term thermal stability test of  $Y(^sBuCp)_3$  at 190 °C for 18 weeks.

Figure S2 presents  $^1H$ -NMR spectra acquired during the long-term thermal stability test. The spectrum of  $Y(^sBuCp)_3$  did not change before or after it was heated at 190 °C for 18 weeks. Therefore,  $Y(^sBuCp)_3$  was confirmed to exhibit excellent long-term thermal stability for at least 18 weeks.

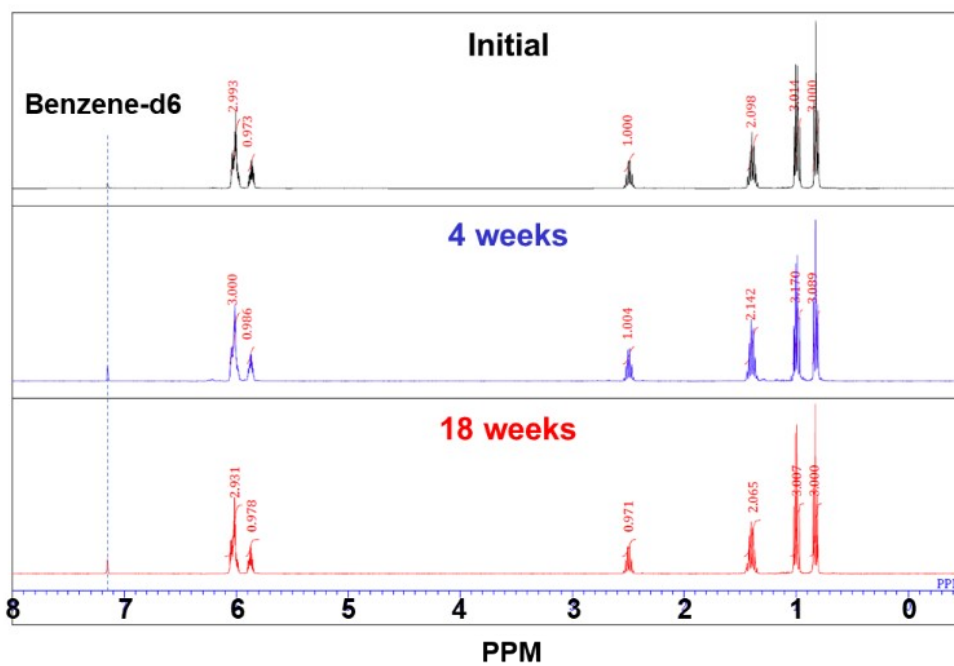

Fig. S2 <sup>1</sup>H-NMR spectra of Y(sBuCp)<sub>3</sub> acquired during long-term thermal stability test at 190 °C for 18 weeks.
